# Supplementary material for: Identification of Post-myocardial Infarction Blood Expression Signatures Using Multiple Feature Selection Strategies
Source: Front Physiol. 2020 Jun 3;11:483. doi: 10.3389/fphys.2020.00483 (PMC7287215; doi:10.3389/fphys.2020.00483)
Supplement: TABLE S2 — The 134 optimal features for building the classifier. [file Table_2.XLSX]

## Sheet: TableS2
DLGAP1-AS1
PYGL
MEGF9
FCAR
PHC2
TPD52L2
SLC37A3
MOB3A
IRAK3
FGD4
JDP2
RAB19
MIR3197
IL1R2
MANSC1
IRS2
MIR4323
SHROOM2
MIR4475
SLC36A4
SYTL3
MXD1
EXTL3
KLHL8
DUSP1
ETF1
ANO10
IL1R1
CSGALNACT2
HCLS1
MIR223
PHKA2
TMEM55A
ECHDC3
HAPLN4
HRG
TAF1L
APOL3
MIR4508
KCNE1
DPY19L3
HAL
CLEC4E
MIR3188
WIBG
AGFG1
ALG1L13P
FAM217B
CDK5R1
HSD11B2
CDCA4
OTTHUMG00000161558
OTTHUMG00000160797
RNU5D-2P
GAB2
ZFAS1
OTTHUMG00000019246
FOS
MIR539
DIRC2
PADI4
FNIP1
IL18R1
RNY3
RNU4-7P
CLEC4D
HBB
MIR329-2
MAP2K6
AATK
ZIC3
CPEB2
RTFDC1
PHKG1
C2orf72
KIF3C
TLR2
SMAP2
IL17RA
MIR3148
UBXN2B
PCNX
OLAH
TTC39C
RAB36
ORMDL1
NECAB3
ERGIC1
AACSP1
SAMSN1
MTF1
INO80B
XPO6
MUC5B
SLED1
KATNB1
GMFB
TLR4
OTTHUMG00000016713
MTMR6
DCK
ANKRD11
PFKFB2
C9orf156
TMEM120A
MIR4754
OTTHUMG00000032883
GPR27
SYAP1
VNN3
OTTHUMG00000165035
SLA
ADSSL1
HNRNPA0
ABHD5
OTTHUMG00000014284
SAP30
QPCT
MIR494
OTTHUMG00000035741
CRK
CCL17
OTTHUMG00000019170
AQP9
BST1
GABARAPL1
ABCC2
HIST1H4A
CDC42BPG
ADRA2C
FBXO33
TMCC3
SSH1
TMCO3
